# Supplementary material for: Remarkable catalytic activity of a sulfonated mesoporous polymer (MP-SO3H) for the synthesis of solketal at room temperature
Source: Royal Society of Chemistry journal article supplement (doi:10.1039/c7nj00211d), 2017-01-01
Supplement: c7nj00211d1.pdf [file c7nj00211d1.pdf]

## Supporting Information

### Remarkable Catalytic Activity of Sulfonated Mesoporous Polymer (MP-SO<sub>3</sub>H) for the Synthesis of Solketal at Room Temperature

Sathyapal R. Churipard <sup>a, b, ‡</sup>, Pandian Manjunathan <sup>a, b, ‡</sup>, Prakash Chandra <sup>a</sup>, Ganapati V. Shanbhag <sup>a</sup>, Raman Ravishankar <sup>c</sup>, Peddy V. C. Rao <sup>c</sup>, Gandham Sri Ganesh <sup>c</sup>, A. B. Halgeri <sup>a</sup> and Sanjeev P. Maradur <sup>a\*</sup>

<sup>a</sup>*Materials Science Division, Poornaprajna Institute of Scientific Research (PPISR), Bidalur Post, Devanahalli, Bengaluru-562164, Karnataka State, India.*

<sup>b</sup>*Graduate Studies, Manipal University, Manipal-576104, Karnataka, India*

<sup>c</sup>*Hindustan Petroleum Green R&D Center (HPGRDC), KIADB Industrial Estate, Tarabahalli, Hoskote Taluk, Bengaluru- 560067, Karnataka, India.*

<sup>‡</sup> *S. R. C and P. M equally contributed to this work*

**\* Corresponding author**

*Tel: +91(080)27408552; Fax: +91 23619034.*

**E-mail: [sanjeevpm@poornaprajna.org](mailto:sanjeevpm@poornaprajna.org)**

## **Tables**

**Table S1.** Physicochemical properties of various solid acid catalysts

**Table S2.** Comparison of TOF of various catalysts

## **Figures**

**Fig. S1.** Nitrogen adsorption-desorption isotherm of unmodified and sulfonated mesoporous polymer

**Fig. S2.** Pore size distribution of unmodified and sulfonated mesoporous polymer

**Fig. S3.** Effect of reaction time

**Table S1.** Physiochemical properties of various solid acid catalysts

| Sample                                          | S <sub>BET</sub><br>(m <sup>2</sup> g <sup>-1</sup> ) | S <sub>Meso</sub> <sup>a</sup><br>(m <sup>2</sup> g <sup>-1</sup> ) | Pore size<br>(nm) <sup>b</sup> | Average<br>Pore size <sup>b</sup><br>(nm) | S content<br>(mmol/g) <sup>c</sup> | Acidity<br>(mmol/g) <sup>d</sup> |
|-------------------------------------------------|-------------------------------------------------------|---------------------------------------------------------------------|--------------------------------|-------------------------------------------|------------------------------------|----------------------------------|
| Amberlyst-15                                    | 39                                                    | -                                                                   | 23.3                           | 16.1                                      | 4.3                                | 4.7                              |
| H-ZSM-5                                         | 425 <sup>e</sup>                                      | -                                                                   | -                              | -                                         | -                                  | 2.0 <sup>f</sup>                 |
| H-Beta                                          | 465                                                   | -                                                                   | -                              | -                                         | -                                  | 1.5 <sup>f</sup>                 |
| Montmorillonite<br>K-10                         | 250 <sup>e</sup>                                      | -                                                                   | -                              | -                                         | -                                  | 1.1                              |
| MoO <sub>3</sub> /SiO <sub>2</sub>              | 180 <sup>g</sup>                                      | -                                                                   | -                              | -                                         | -                                  | 1.6 <sup>f</sup>                 |
| SO <sub>4</sub> <sup>2-</sup> /ZrO <sub>2</sub> | 57                                                    | -                                                                   | -                              | 3.2                                       | -                                  | 1.1 <sup>f</sup>                 |

a = from t-plot method

b = Pore size distribution by BJH method

c = Measured by elemental analysis

d = Measured by acid-base titration

e = from the manufacturer

f = from TPD-NH<sub>3</sub>

g= from reference <sup>[1]</sup>

**Table S2.** Comparison of TOF of various catalysts

MP-SO<sub>3</sub>H-24 catalyst outperformed other screened catalysts and showed higher TOF of 5682/h. The high activity of MP-SO<sub>3</sub>H-24 catalyst is attributed to its easy accessibility of active sites due to the presence of the mesoporous nature and high surface area.

| Catalyst <sup>[a]</sup>                         | Glycerol conversion (wt %) | Solketal selectivity (wt %) | TOF/h <sup>[b]</sup> |
|-------------------------------------------------|----------------------------|-----------------------------|----------------------|
| A-15                                            | 15.0                       | 78                          | 689                  |
| MoO <sub>3</sub> /SiO <sub>2</sub>              | 0.5                        | 70                          | 68                   |
| K-10                                            | 1.2                        | 81                          | 236                  |
| H-ZSM-5                                         | 1.0                        | 80                          | 108                  |
| H-Beta                                          | 11.5                       | 76                          | 1656                 |
| MP-SO <sub>3</sub> H-24                         | 60.5                       | 97.5                        | 5682                 |
| SO <sub>4</sub> <sup>2-</sup> /ZrO <sub>2</sub> | 3.5                        | 89.6                        | 687                  |

<sup>[a]</sup> Reaction conditions: Glycerol = 2.5g, Acetone = 1.6g, Glycerol: acetone = 1:1, catalyst = 0.1wt% (referred to glycerol weight), reaction temperature = 30 °C, time = 30 min.

<sup>[b]</sup> TOF = TON<sup>[c]</sup>/ Time (h)

<sup>[c]</sup> TON = moles of glycerol converted per mole of active sites

**Fig. S1.** Nitrogen adsorption-desorption isotherm of unmodified and sulfonated mesoporous polymer

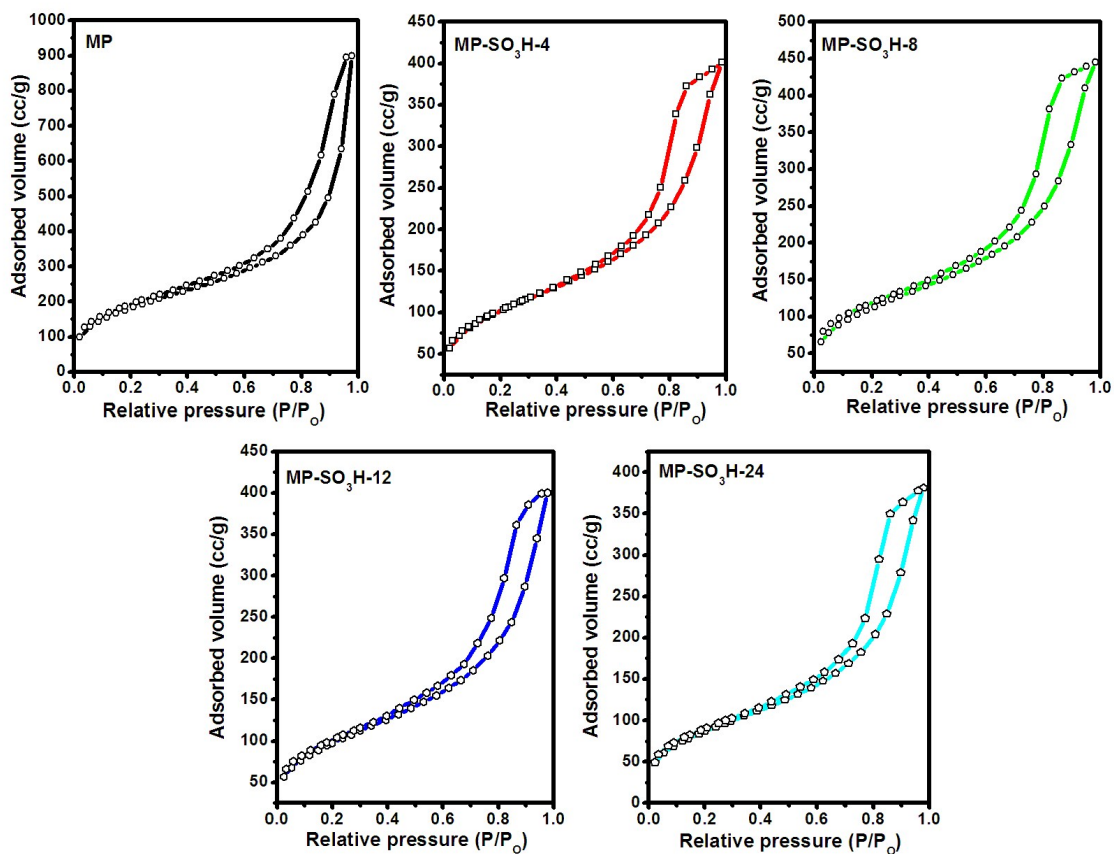

**Fig. S2.** Pore size distribution of unmodified and sulfonated mesoporous polymer

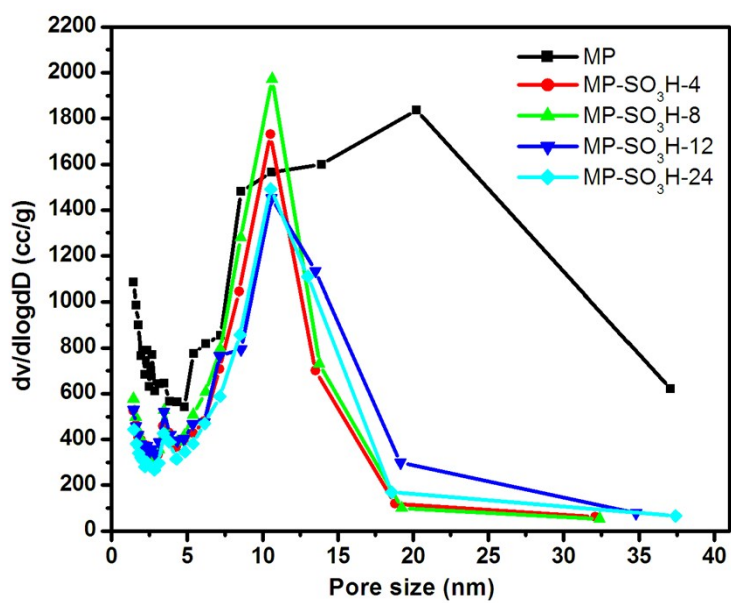

**Fig. S3:** Effect of reaction time

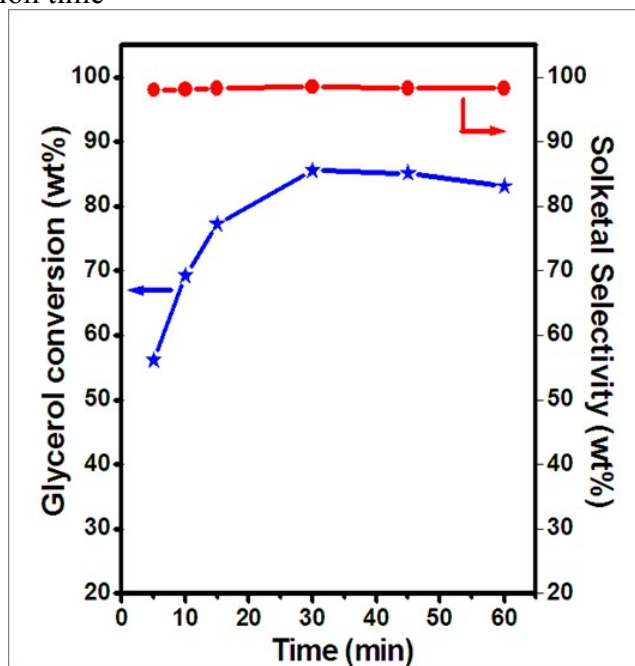

**Reaction condition:** Glycerol: acetone = 1:2, Catalyst = 0.5wt% (referred to glycerol wt), reaction temperature = 30 °C.

### Reference

- [1] A. P. Amrute, A. Bordoloi, N. Lucas, K. Palraj, S. Halligudi, *Catalysis letters* **2008**, *126*, 286-292.
